# Supplementary material for: On lifestyle trends, health and mosquitoes: Formulating welfare levels for control of the Asian tiger mosquito in Greece
Source: PubMed Central journal article supplement (PMC6568418; doi:10.1371/journal.pntd.0007467), 2019-06-04
Supplement: pntd.0007467.s003.pdf [file pntd.0007467.s003.pdf]

| <i>Assuming that the following mosquito control programs are the only choices you can made, which one do you choose?</i>            |                                                                                                                    |                                                                                                                    |                                                                                           |
|-------------------------------------------------------------------------------------------------------------------------------------|--------------------------------------------------------------------------------------------------------------------|--------------------------------------------------------------------------------------------------------------------|-------------------------------------------------------------------------------------------|
|                                                                                                                                     | <b>Option A</b>                                                                                                    | <b>Option B</b>                                                                                                    | <b>Option C<br/>(Status quo)</b>                                                          |
| Risk level of a WNV outbreak                                                                                                        | Average risk<br>                  | High risk<br>                     | Neither Option A, nor Option B                                                            |
| Further public health actions to reduce the Tiger Mosquito health risks                                                             | YES<br>                           | NO<br>                            |                                                                                           |
| Nuisance level of mosquitoes during day time<br>   | No improvement<br>                | Improved level – Low Nuisance<br> | Current situation (i.e. current mosquito control program)                                 |
| Nuisance level of mosquitoes during night time<br> | Improved level – Low Nuisance<br> | Improved level – No Nuisance<br>  |                                                                                           |
| Expected bi-monthly cost                                                                                                            | 10€<br>                          | 15€<br>                          | 0€<br> |
| <b>Choice</b>                                                                                                                       |                                                                                                                    |                                                                                                                    |                                                                                           |

Source: Bithas, K., Latinopoulos, D., Kolimenakis, A. and Richardson, C., 2018. Social benefits from controlling invasive Asian tiger and native mosquitoes: a stated preference study in Athens, Greece. *Ecological Economics*, 145, pp.46-56.
